# Supplementary material for: Preparation, Characterization and Evaluation of Antibacterial Properties of Polylactide-Polyethylene Glycol-Chitosan Active Composite Films
Source: MDPI journal article supplement (doi:10.3390/polym14112266), 2022-06-01
Supplement: s1 [file s1]

# Preparation, Characterization and Evaluation of Antibacterial Properties of Polylactide-Polyethylene Glycol-Chitosan Active Composite Films

Rómulo Salazar <sup>1,\*</sup>, Veronica Salas-Gomez <sup>1</sup>, Adriana A. Alvarado <sup>2</sup> and Haci Baykara <sup>1,3,\*</sup>

<sup>1</sup> Facultad de Ingeniería en Mecánica y Ciencias de la Producción, Escuela Superior Politécnica del Litoral—ESPOL, Campus Gustavo Galindo, Km 30.5 Vía Perimetral, Guayaquil 090902, Ecuador; verdesal@espol.edu.ec

<sup>2</sup> Departamento de Química y Ciencias Ambientales, Facultad de Ciencias Naturales y Matemáticas, Escuela Superior Politécnica del Litoral—ESPOL, Campus Gustavo Galindo, Km 30.5 Vía Perimetral, Guayaquil 090902, Ecuador; addealva@espol.edu.ec

<sup>3</sup> Center of Nanotechnology Research and Development (CIDNA), Escuela Superior Politécnica del Litoral—ESPOL, Campus Gustavo Galindo, Km 30.5 Vía Perimetral, Guayaquil 090902, Ecuador

\* Correspondence: rvsalaza@espol.edu.ec (R.S.); hbaykara@espol.edu.ec (H.B.)

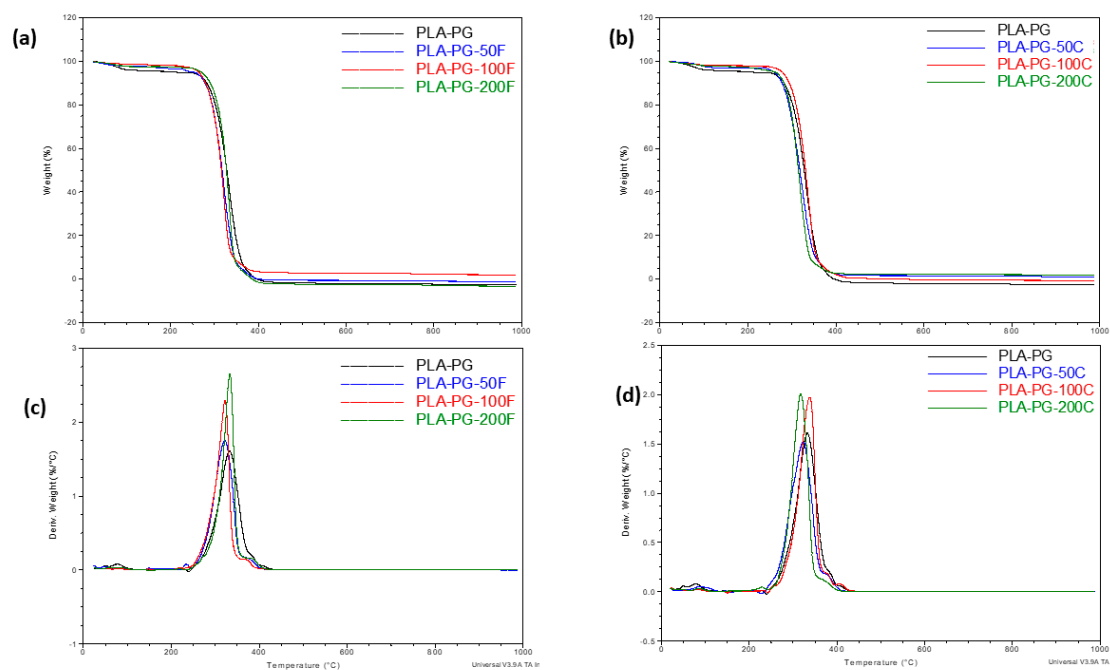

**Figure S1.** Thermogravimetric curves of PLA-PEG samples with chitosan at different concentrations: (a) TGA synthetic chitosan; (b) TGA commercial chitosan; (c) dTGA commercial chitosan; (d) dTGA synthetic chitosan.

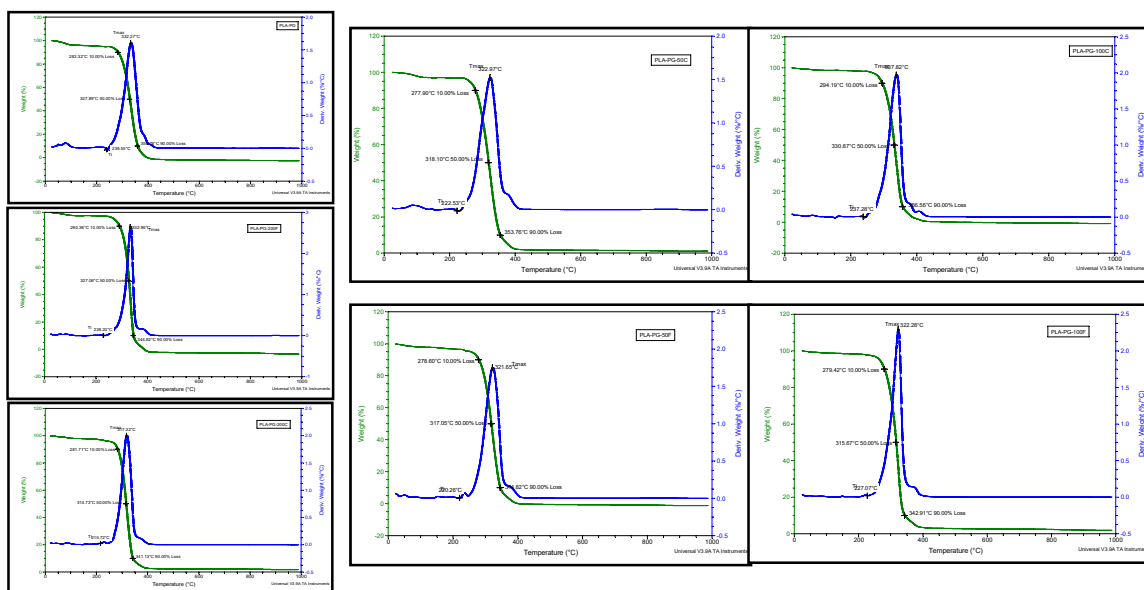

**Figure S2.** Thermogravimetric curves of PLA-PEG samples with chitosan at different concentrations showing the values of  $T_i$ ,  $T_{max}$ ,  $T_{01}$ ,  $T_{05}$ , and  $T_{09}$ .

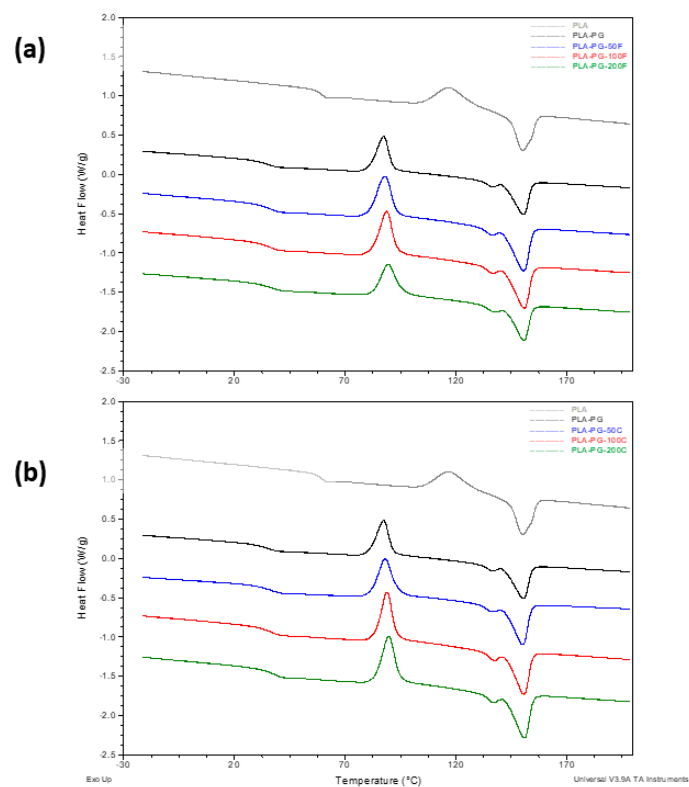

**Figure S3.** DSC thermal curves of the samples: (a) PLA-PG-CH (synthetic) and (b) PLA-PG-CH (commercial).

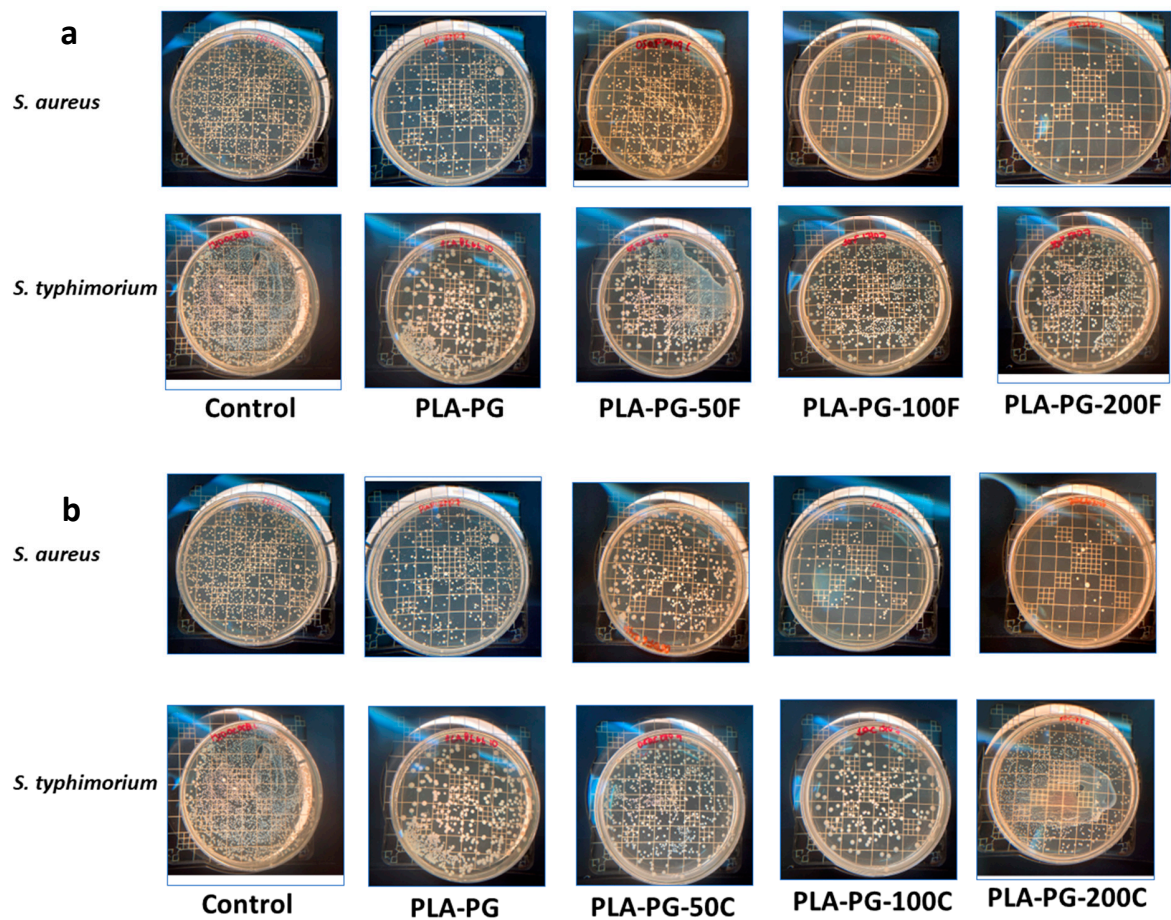

**Figure S4.** Microbiological assay images showing the impact of each film sample against bacteria studied: (a) PLA-PG-CH (synthetic) and (b) PLA-PG-CH (commercial).
